# Supplementary material for: Hierarchical clustering of gene expression patterns in the Eomes + lineage of excitatory neurons during early neocortical development
Source: PubMed Central journal article supplement (PMC3583225; doi:10.1186/1471-2202-13-90), 2012-08-01

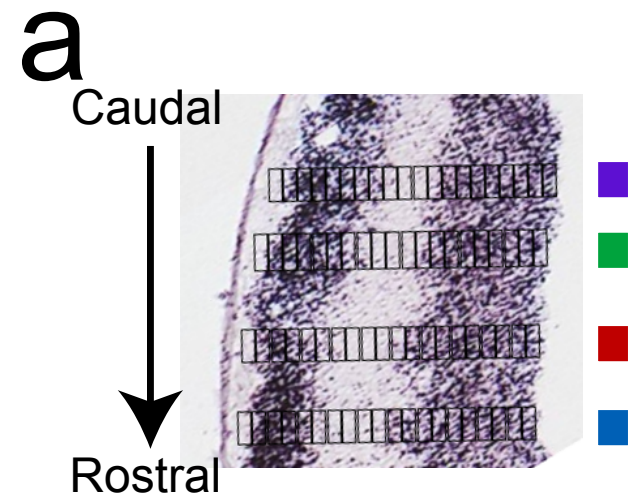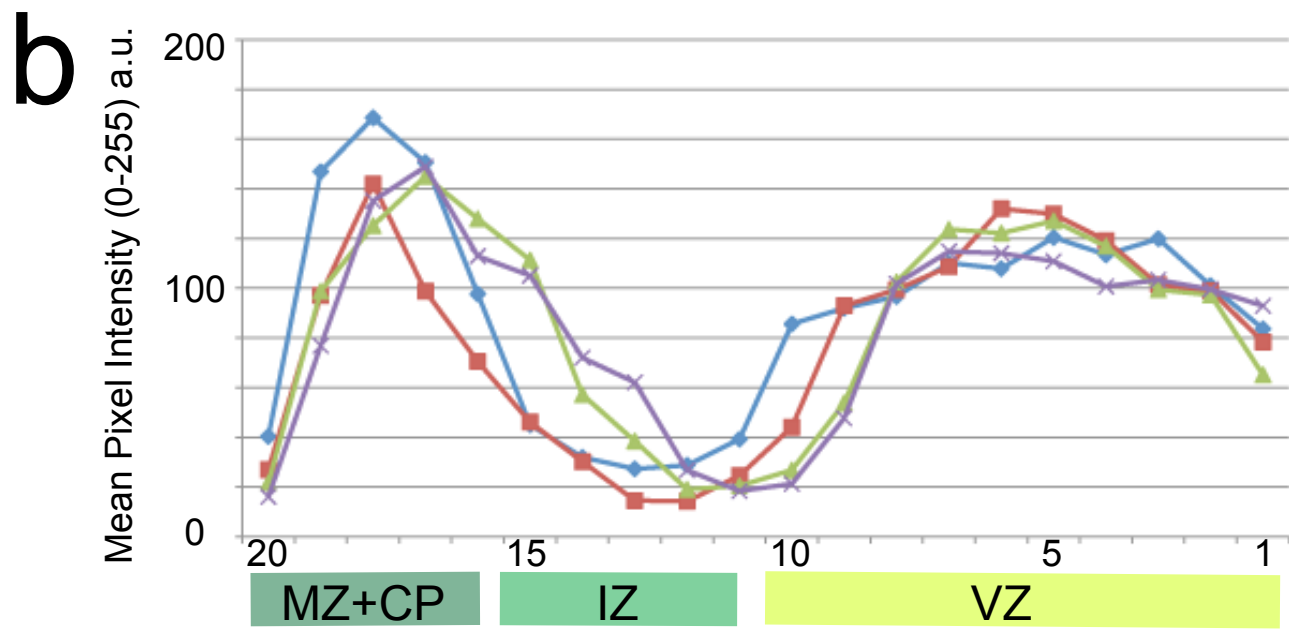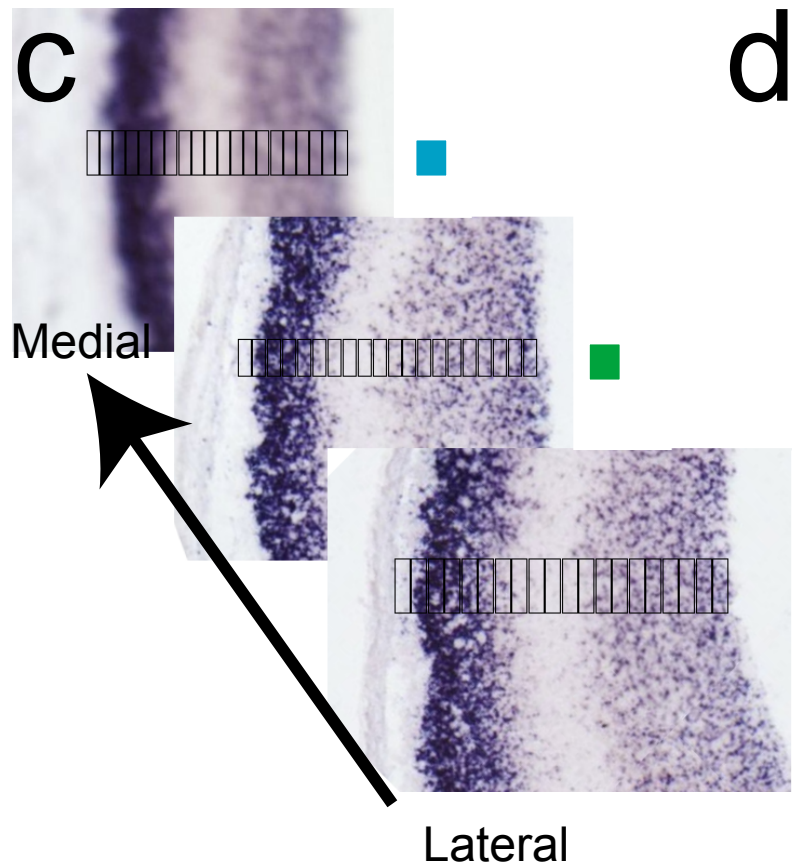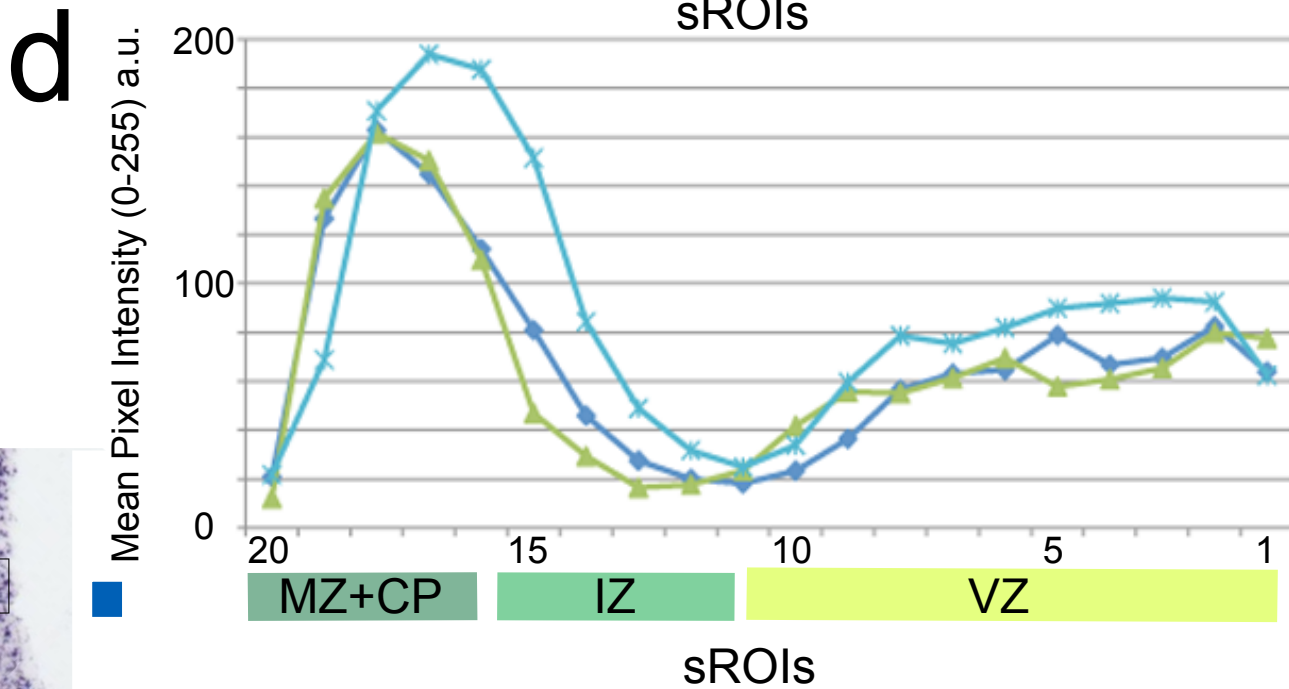

Supplement: 1471-2202-13-90-S6.pdf [file 1471-2202-13-90-S6.pdf]
