# Supplementary material for: Hierarchical clustering of gene expression patterns in the Eomes + lineage of excitatory neurons during early neocortical development
Source: PubMed Central journal article supplement (PMC3583225; doi:10.1186/1471-2202-13-90), 2012-08-01
Supplement: 1471-2202-13-90-S7.pdf [file 1471-2202-13-90-S7.pdf]

Additional File 7. Functional groupings of QISPs based on Gene Ontology (GO) molecular function and biological process annotations. Genes are grouped according to zone of expression: deep (D, dark gray), middle (M, light gray), upper (U, white). Listed genes are ranked by fold up-regulation.

### Transcription

| Fold | Gene          | Zone | Gene# | Clust# |
|------|---------------|------|-------|--------|
| 4.1  | Neurod4       | D    | 307   | 13     |
| 3.9  | Bcl6          | D U  | 315   | 15     |
| 3.5  | D430015B01Rik | D U  | 286   | 11     |
| 3.4  | Tanc2         | D U  | 310   | 14     |
| 3.1  | Myt1          | D U  | 299   | 12     |
| 72   | Neurod6       | M    | 281   | 10     |
| 31   | Neurod1       | M    | 260   | 9      |
| 12   | Nhlh1         | M    | 246   | 9      |
| 7.3  | Neurod2       | M    | 257   | 9      |
| 6.9  | Myt11         | M    | 240   | 9      |
| 5.6  | Aff3          | M    | 270   | 10     |
| 3.8  | Trp53inp1     | M    | 262   | 9      |
| 3.4  | Lhx9          | M    | 245   | 9      |
| 43   | Tbr1          | U    | 87    | 3      |
| 19   | Bhlhb5        | U    | 217   | 6      |
| 18   | Hivep2        | U    | 6     | 2      |
| 13   | Prdm8         | U    | 177   | 6      |
| 12   | Nr4a3         | U    | 43    | 2      |
| 12   | Satb2         | U    | 166   | 6      |
| 5.7  | Nfe2l3        | U    | 143   | 6      |
| 5.2  | Sox5          | U    | 122   | 6      |
| 4.8  | Ldb2          | U    | 94    | 4      |
| 4.5  | Bcl11b        | U    | 80    | 3      |
| 4.1  | Id2           | U    | 216   | 6      |
| 4.1  | Tcp11l2       | U    | 132   | 6      |
| 4    | Ppp1r16b      | U    | 130   | 6      |
| 3.9  | St18          | U    | 51    | 3      |
| 3.8  | Zfp238        | U    | 226   | 6      |
| 3.8  | Scrt1         | U    | 215   | 6      |
| 3.6  | Ier5          | U    | 146   | 6      |
| 3.4  | Thra          | U    | 208   | 6      |
| 3.3  | Btbd11        | U    | 174   | 6      |
| 3.3  | Asx3          | U    | 35    | 2      |
| 3.1  | Nap1l2        | U    | 50    | 3      |
| 3.1  | Zfpm2         | U    | 107   | 4      |
| 3.1  | Mef2c         | U    | 97    | 4      |
| 3.1  | Nelf          | U    | 129   | 6      |

### Adhesion

| Fold | Gene          | Zone | Gene# | Clust# |
|------|---------------|------|-------|--------|
| 3.1  | Opclm1        | D U  | 317   | 15     |
| 7.9  | L1cam         | M    | 268   | 10     |
| 3.1  | Pcdh20        | M    | 276   | 10     |
| 2.9  | Cdh8          | M    | 244   | 9      |
| 32.9 | Cntn2         | U    | 210   | 6      |
| 10.8 | Cdh13         | U    | 96    | 4      |
| 9.1  | Lrnf5         | U    | 128   | 6      |
| 8.1  | 9030425E11Rik | U    | 190   | 6      |
| 7.8  | Dscam         | U    | 209   | 6      |
| 7    | Nrxn1         | U    | 74    | 3      |
| 5.7  | Nfasc         | U    | 90    | 3      |
| 5.2  | Tes           | U    | 205   | 6      |
| 5.1  | Clistn2       | U    | 27    | 2      |
| 4.7  | Cdh12         | U    | 15    | 2      |
| 4    | Flrt2         | U    | 173   | 6      |
| 3.8  | Aplp1         | U    | 71    | 3      |
| 3.8  | Cdh11         | U    | 66    | 3      |
| 3.6  | Flrt1         | U    | 49    | 3      |
| 3.3  | Cdk5r1        | U    | 203   | 6      |
| 3.3  | Ctnna2        | U    | 196   | 6      |
| 3    | Cadm3         | U    | 147   | 6      |

### Kinases and adaptors

| Fold | Gene    | Zone | Gene# | Clust# |
|------|---------|------|-------|--------|
| 4.1  | Camk2b  | D U  | 292   | 12     |
| 3.5  | Dok4    | D U  | 290   | 11     |
| 3.2  | Sh3bp5  | D U  | 294   | 12     |
| 10.2 | Nuak1   | M    | 259   | 9      |
| 3.4  | Pak7    | M    | 272   | 10     |
| 3.4  | Itpk1   | M    | 271   | 10     |
| 3    | Sh2d4b  | M    | 284   | 10     |
| 21.9 | Sla     | U    | 22    | 2      |
| 6.8  | Plk2    | U    | 33    | 2      |
| 6    | Stk32b  | U    | 19    | 2      |
| 5.2  | Prkce   | U    | 100   | 4      |
| 5.2  | Camkv   | U    | 93    | 4      |
| 4.1  | Sphkap  | U    | 102   | 4      |
| 3.8  | Sh3kbp1 | U    | 211   | 6      |
| 3.7  | Pfkb    | U    | 18    | 2      |
| 3.5  | Dclk1   | U    | 222   | 6      |
| 3.5  | Prkcz   | U    | 47    | 3      |
| 3.3  | Shb     | U    | 121   | 6      |
| 3    | Prkar1b | U    | 106   | 4      |
| 3    | Prkaa2  | U    | 133   | 6      |

### Receptors

| Fold | Gene   | Zone  | Gene# | Clust# |
|------|--------|-------|-------|--------|
| 9.7  | Sstr2  | D     | 306   | 13     |
| 4.1  | Ryr3   | D M U | 1     | 1      |
| 4.1  | Gipr   | D U   | 234   | 7      |
| 14   | Plxna4 | M     | 252   | 9      |
| 9.7  | Nrp1   | M     | 243   | 9      |
| 5    | Unc5d  | M     | 253   | 9      |
| 4.9  | Sema7a | M     | 275   | 10     |
| 4.5  | Chrn2  | M     | 264   | 10     |
| 4.5  | Celsr3 | M     | 279   | 10     |
| 4    | Sema6d | M     | 242   | 9      |
| 4    | Plxna2 | M     | 251   | 9      |
| 3.4  | Olfm1  | M     | 283   | 10     |
| 3.1  | Robo2  | M     | 249   | 9      |
| 14   | Mc4r   | U     | 25    | 2      |
| 11   | Kit    | U     | 200   | 6      |
| 11   | Gira2  | U     | 82    | 3      |
| 11   | Cnr1   | U     | 161   | 6      |
| 7.8  | Gpr85  | U     | 191   | 6      |
| 7.1  | Abcc8  | U     | 138   | 6      |
| 6.1  | Ifngr2 | U     | 62    | 3      |
| 5.8  | Robo1  | U     | 72    | 3      |
| 5.7  | Sez6l  | U     | 76    | 3      |
| 5.1  | Dcc    | U     | 149   | 6      |
| 4.6  | Gabrg2 | U     | 125   | 6      |
| 4.2  | Npr2   | U     | 182   | 6      |
| 4.1  | Ptpro  | U     | 92    | 4      |
| 3.9  | Gabbr2 | U     | 118   | 6      |
| 3.9  | Sema4g | U     | 70    | 3      |
| 3.8  | Plxnd1 | U     | 16    | 2      |
| 3.7  | Sez6l2 | U     | 165   | 6      |
| 3.5  | Gpr21  | U     | 137   | 6      |
| 3.1  | Gpr22  | U     | 101   | 4      |
| 3    | Chrm3  | U     | 151   | 6      |
| 3    | Ephb1  | U     | 108   | 4      |

### Ion channels and solute carriers

| Fold | Gene     | Zone | Gene# | Clust# |
|------|----------|------|-------|--------|
| 3.3  | Nkain3   | D U  | 311   | 14     |
| 3    | Cacna1h  | D U  | 113   | 5      |
| 19.4 | Slc17a6  | M    | 247   | 9      |
| 12   | Slc17a7  | U    | 139   | 6      |
| 7.9  | Cacna1e  | U    | 23    | 2      |
| 7.3  | Kcnq3    | U    | 120   | 6      |
| 6.5  | Cacna2d1 | U    | 195   | 6      |
| 6.4  | Slc1a1   | U    | 38    | 2      |
| 5.3  | Scn2a1   | U    | 24    | 2      |
| 5    | Slc8a1   | U    | 158   | 6      |
| 4.8  | Kcnj3    | U    | 77    | 3      |
| 4.1  | Kcna1    | U    | 60    | 3      |
| 4    | Kcna6    | U    | 119   | 6      |
| 3.9  | Scn3b    | U    | 28    | 2      |
| 3.1  | Cacnb3   | U    | 193   | 6      |

### Extracellular

| Fold | Gene          | Zone | Gene# | Clust# |
|------|---------------|------|-------|--------|
| 5.6  | Igfb2         | D    | 308   | 13     |
| 6.4  | Chga          | D U  | 296   | 12     |
| 6.2  | Adamtsl3      | D U  | 289   | 11     |
| 4    | Pcsk2         | D U  | 316   | 15     |
| 3.8  | Cck           | D U  | 302   | 12     |
| 3    | C1q13         | D U  | 231   | 7      |
| 6.1  | Serpini1      | M    | 282   | 10     |
| 5.2  | Nxph4         | M    | 238   | 9      |
| 4.6  | Sema3c        | M    | 241   | 9      |
| 4.5  | Sparcl1       | M    | 263   | 10     |
| 3.7  | Mfap4         | M    | 239   | 9      |
| 3    | Nptx1         | M    | 254   | 9      |
| 11.1 | Rspo3         | U    | 58    | 3      |
| 8.1  | Wnt7b         | U    | 214   | 6      |
| 7.4  | 6530402F18Rik | U    | 218   | 6      |
| 5.5  | Reln          | U    | 169   | 6      |
| 5.3  | Efna3         | U    | 39    | 2      |
| 5.2  | Igf1          | U    | 2     | 2      |
| 5.2  | Edil3         | U    | 197   | 6      |
| 4.6  | Scg3          | U    | 224   | 6      |
| 4.4  | Lamb1-1       | U    | 29    | 2      |
| 4.3  | Necab3        | U    | 140   | 6      |
| 3.8  | Nell2         | U    | 172   | 6      |
| 3.8  | Cnih3         | U    | 131   | 6      |
| 3.7  | Slit1         | U    | 103   | 4      |
| 3.5  | Spock1        | U    | 109   | 4      |
| 3.3  | Kirrel3       | U    | 134   | 6      |
| 3.1  | Nxph3         | U    | 32    | 2      |

### Small G-protein signaling

| Fold | Gene     | Zone | Gene# | Clust# |
|------|----------|------|-------|--------|
| 6.5  | Rasgef1b | D U  | 300   | 12     |
| 5.9  | Rnd2     | M    | 274   | 10     |
| 21   | Tiam2    | U    | 187   | 6      |
| 17.1 | Elmod1   | U    | 164   | 6      |
| 6.2  | Rgs6     | U    | 37    | 2      |
| 5.3  | Rab3d    | U    | 229   | 6      |
| 4.8  | Rab3c    | U    | 83    | 3      |
| 4.7  | Gnal     | U    | 44    | 2      |
| 4.5  | Ica1l    | U    | 14    | 2      |
| 4.1  | Rab3a    | U    | 88    | 3      |
| 4.1  | Psd      | U    | 81    | 3      |
| 4.1  | Arhgap29 | U    | 34    | 2      |
| 3.7  | Nin      | U    | 95    | 4      |
| 3.5  | Rundc3a  | U    | 181   | 6      |
| 3.4  | Spg3a    | U    | 52    | 3      |
| 3.3  | Ica1     | U    | 85    | 3      |
| 3.1  | Arl8a    | U    | 135   | 6      |

### Synaptic

| Fold | Gene   | Zone | Gene# | Clust# |
|------|--------|------|-------|--------|
| 5.6  | Cbln2  | D    | 303   | 13     |
| 3.9  | Syn2   | M    | 261   | 9      |
| 3.2  | Dlg2   | M    | 256   | 9      |
| 6.7  | Syt4   | U    | 192   | 6      |
| 6.5  | Sv2b   | U    | 26    | 2      |
| 6.1  | Ank3   | U    | 64    | 3      |
| 5    | Stxbp1 | U    | 42    | 2      |
| 5    | Snap25 | U    | 202   | 6      |
| 4.7  | Lrrc7  | U    | 67    | 3      |
| 4.3  | Snca   | U    | 45    | 2      |
| 4.1  | Lrrtm4 | U    | 53    | 3      |
| 3.9  | Cplx1  | U    | 123   | 6      |
| 3.9  | Dmxl2  | U    | 55    | 3      |
| 3.9  | Gp1bb  | U    | 153   | 6      |
| 3.8  | Trim9  | U    | 41    | 2      |
| 3.7  | Unc13a | U    | 68    | 3      |
| 3.5  | Lrrtm1 | U    | 150   | 6      |
| 3.4  | Sv2a   | U    | 31    | 2      |
| 3.3  | Svop   | U    | 179   | 6      |
| 3.2  | Erc2   | U    | 156   | 6      |
| 3.1  | Syn1   | U    | 136   | 6      |
| 2.8  | Lrrtm3 | U    | 57    | 3      |

### Phosphatases

| Fold | Gene     | Zone | Gene# | Clust# |
|------|----------|------|-------|--------|
| 3.7  | Ppp1r14a | D U  | 287   | 11     |
| 2.8  | Lpin1    | M    | 266   | 10     |
| 9.1  | Dnajc6   | U    | 148   | 6      |
| 8.8  | Ppp2r2c  | U    | 30    | 2      |
| 6.5  | Arpp21   | U    | 168   | 6      |
| 3.4  | Ppp2r2b  | U    | 225   | 6      |
| 3.4  | Nav1     | U    | 228   | 6      |
| 3.4  | Phactr3  | U    | 154   | 6      |
| 3    | Ppp1r1b  | U    | 75    | 3      |

### Cytoskeletal

| Fold | Gene    | Zone | Gene# | Clust# |
|------|---------|------|-------|--------|
| 7.6  | Kif21b  | M    | 255   | 9      |
| 15   | Dync1i1 | U    | 17    | 2      |
| 6.1  | Gas7    | U    | 126   | 6      |
| 5.5  | Jakmip1 | U    | 79    | 3      |
| 5    | Cttnbp2 | U    | 213   | 6      |
| 4.9  | Kif5a   | U    | 204   | 6      |
| 4.9  | Slitrk1 | U    | 65    | 3      |
| 3.9  | Dixdc1  | U    | 91    | 3      |
| 3.5  | Mapt    | U    | 175   | 6      |
| 3.3  | Dcx     | U    | 56    | 3      |
| 3.3  | Atcay   | U    | 86    | 3      |
| 3.3  | Cotl1   | U    | 184   | 6      |
| 3.2  | Apc2    | U    | 11    | 2      |
| 3    | Stmn2   | U    | 201   | 6      |
| 3    | Add2    | U    | 145   | 6      |
| 3    | Nav2    | U    | 188   | 6      |
| 2.9  | Gap43   | U    | 13    | 2      |
| 2.9  | Dpysl5  | U    | 227   | 6      |

### Proteolysis

| Fold | Gene   | Zone | Gene# | Clust# |
|------|--------|------|-------|--------|
| 4.2  | Pappa2 | D U  | 312   | 14     |
| 3.9  | Herc3  | D U  | 114   | 5      |
| 3.5  | Odz1   | D U  | 293   | 12     |
| 8.4  | Hecw1  | U    | 127   | 6      |
| 4.9  | Znrf2  | U    | 163   | 6      |
| 4.3  | Rnf182 | U    | 4     | 2      |
| 4    | Usp29  | U    | 7     | 2      |
| 3.7  | Dact1  | U    | 98    | 4      |

### Other enzymes

| Fold | Gene          | Zone | Gene# | Clust# |
|------|---------------|------|-------|--------|
| 4.9  | Ust           | D    | 305   | 13     |
| 3.9  | Csmd3         | D    | 309   | 13     |
| 4.2  | Atp1a3        | D U  | 314   | 15     |
| 4    | Pde1a         | D U  | 115   | 5      |
| 3.7  | Pde10a        | D U  | 233   | 7      |
| 3.4  | Lpl           | D U  | 295   | 12     |
| 3.4  | Adcy1         | D U  | 291   | 11     |
| 3    | Eno2          | D U  | 112   | 5      |
| 6.4  | Plcb1         | M    | 248   | 9      |
| 5.1  | 4631426J05Rik | M    | 265   | 10     |
| 4.8  | Gramd1b       | M    | 278   | 10     |
| 3    | Pam           | M    | 273   | 10     |
| 6.1  | Wbscr17       | U    | 171   | 6      |
| 5.9  | Prmt8         | U    | 185   | 6      |
| 5.5  | St3gal1       | U    | 104   | 4      |
| 4.8  | Chst1         | U    | 141   | 6      |
| 4.6  | Mpped1        | U    | 212   | 6      |
| 4.4  | Sgip1         | U    | 162   | 6      |
| 4.2  | St8sia3       | U    | 84    | 3      |
| 4    | Nsg2          | U    | 180   | 6      |
| 3.7  | B3galt1       | U    | 99    | 4      |
| 3.6  | Parp6         | U    | 199   | 6      |
| 3.3  | Pde9a         | U    | 69    | 3      |
| 3.2  | Mmp24         | U    | 54    | 3      |
| 3.2  | Tmem108       | U    | 105   | 4      |
| 3.1  | Mgll1         | U    | 117   | 6      |
| 3.1  | Acot9         | U    | 78    | 3      |
| 3.1  | Nmnat2        | U    | 207   | 6      |
| 3.1  | B3gat1        | U    | 110   | 4      |
| 3    | Atp2b2        | U    | 198   | 6      |

### Other

| Fold | Gene    | Zone | Gene# | Clust# |
|------|---------|------|-------|--------|
| 3.6  | Palmd   | D    | 304   | 13     |
| 17   | Nrn1    | D U  | 297   | 12     |
| 11   | Rlbp111 | D U  | 298   | 12     |
| 5.9  | Sec24d  | D U  | 116   | 5      |
| 3.9  | Vat1    | D U  | 288   | 11     |
| 3.7  | Gdap1   | D U  | 313   | 15     |
| 8.9  | Tmem74  | M    | 269   | 10     |
| 6.8  | Pcp4    | M    | 250   | 9      |
| 5.1  | Serinc5 | M    | 237   | 9      |
| 3.2  | Lzts1   | M    | 277   | 10     |
| 3    | Gdap111 | M    | 280   | 10     |
| 8.3  | A2bp1   | U    | 21    | 2      |
| 7.6  | Nos1    | U    | 230   | 6      |
| 6.3  | Ppfla2  | U    | 157   |        |
